# Supplementary material for: Measuring national capability over big science’s multidisciplinarity: A case study of nuclear fusion research
Source: PubMed Central journal article supplement (PMC6368312; doi:10.1371/journal.pone.0211963), 2019-02-08
Supplement: pone.0211963.s001.pdf [file pone.0211963.s001.pdf]

## S1 Appendix. Determining the number of topics from static LDA model.

The recent work using the regression-based document influence model (rDIM) introduces a method to determine the number of topics  $K$  as an input of topic modeling [1]. In general, it runs a static LDA for a large  $K$ , and then it specifies the number of significant topics whose corresponding documents have a sufficient number of words larger than  $w_{th}$ . In addition to that, we found the minimal  $K$  by varying the threshold  $w_{th}$ . The details are as follows.

First, we ran a static LDA for  $K = 500$  following the reference. In each topic  $t$  with  $n_d(t)$  corresponding document, we found the number of documents  $n_x(t)$  that contained more than  $w_{th}$  words (tokens). Then, we determined the significance of the topic from the proportion  $p(t) = n_x(t)/n_d(t)$ . In the range near the average value of per-document tokens,  $p(t)$  has a Gaussian distribution. From the kernel density estimation (KDE) of this Gaussian distribution, we determined the number of significant topics whose proportion of document  $p(t)$  is larger than the cutoff proportion, where the derivative of KDE is minimal. By considering the size of tokens in a document, we set the threshold  $w_{th} = 50$ . As a result, the number of topics was determined as  $K = 41$  (S1 Fig).

1. Gerow A, Hu Y, Boyd-Graber J, Blei DM, Evans JA. Measuring discursive influence across scholarship. Proceedings of the National Academy of Sciences. 2018;p. 201719792.
