# Supplementary material for: Measuring national capability over big science’s multidisciplinarity: A case study of nuclear fusion research
Source: PubMed Central journal article supplement (PMC6368312; doi:10.1371/journal.pone.0211963), 2019-02-08
Supplement: pone.0211963.s003.pdf [file pone.0211963.s003.pdf]

## S1 Table. The top 10 words for 41 topics in nuclear fusion research.

The top 10 words for each topic were obtained from the dynamic topic model on 25,085 abstracts between 1976 and 2016. We manually named 41 topics using the list of the top 15 words of each topic, and the top 10 words among them are listed here.

| Topic                                    | Top 10 words                                                                                            |
|------------------------------------------|---------------------------------------------------------------------------------------------------------|
| Wall material, Liquid lithium            | wall, material, lithium, tungsten, component, heat, surface, pfc, facing, liquid                        |
| Neutron detector, Spectrum               | neutron, detector, jet, measurement, reaction, mev, spectrum, rate, fast, radiation                     |
| Neoclassical tearing mode                | island, tearing, mhd, instability, neoclassical, surface, mn, magnetohydrodynamic, phase, activity      |
| Transport simulation                     | model, code, transport, agreement, calculation, numerical, developed, simulated, modelling, compared    |
| Sawtooth crash, Stellarator              | sawtooth, crash, helical, stellarator, reconnection, oscillation, lhd, device, configuration, large     |
| Neutral beam injection                   | beam, neutral, injection, nbi, source, gas, power, injector, efficiency, injected                       |
| Resonant magnetic perturbation           | perturbation, resonant, rmp, response, pellet, applied, rmps, coil, toroidal, torque                    |
| Flux surface, Separatrix                 | surface, side, region, line, poloidal, inside, separatrix, closed, near, midplane                       |
| Plasma flow                              | flow, toroidal, electric, radial, velocity, poloidal, parallel, zonal, asymmetry, neoclassical          |
| Surface material, Carbon tile            | surface, tungsten, sample, layer, carbon, deuterium, hydrogen, retention, material, film                |
| Power, Gyrotron, Tore Supra              | power, antenna, system, ghz, rf, mw, gyrotron, tore, supra, transmission                                |
| Magnetohydrodynamics                     | stability, equilibrium, pressure, mhd, ideal, profile, beta, ballooning, kink, toroidal                 |
| Internal transport barrier, Steady-state | state, shear, barrier, transport, steady, profile, formation, itb, reversed, bootstrap                  |
| Model, Numerical calculation             | method, equation, solution, equilibrium, problem, numerical, function, approach, boundary, distribution |
| Impurity                                 | impurity, runaway, radiation, discharge, gas, disruption, generation, wall, carbon, injection           |
| Diagnostics                              | system, measurement, diagnostic, resolution, signal, profile, laser, measure, scattering, spatial       |
| Divertor                                 | divertor, heat, target, configuration, power, plate, load, outer, particle, lower                       |
| Power supply                             | power, voltage, supply, system, circuit, loop, arc, breakdown, pulse, kv                                |
| Discharge                                | increase, time, decrease, increasing, increased, value, discharge, observed, change, rate               |
| Lower hybrid current drive               | wave, drive, hybrid, lower, lhcd, power, efficiency, frequency, rf, antenna                             |
| Soft X-ray, Imaging                      | xray, camera, reconstruction, measurement, image, imaging, profile, diagnostics, soft, emission         |
| Turbulent transport, Gyrokinetic         | transport, profile, gradient, heat, core, particle, turbulent, gyrokinetic, neoclassical, region        |
| Edge-localized mode                      | elm, hmode, filament, localized, asdex, observed, upgrade, jet, phase, frequency                        |
| Alfvén eigenmode, NSTX                   | spherical, ratio, alfvén, aspect, nstx, toroidal, frequency, eigenmodes, torus, gap                     |
| Electron cyclotron resonance heating     | cyclotron, resonance, ecrh, harmonic, ec, frequency, icrf, power, ech, emission                         |
| Geodesic acoustic mode                   | fluctuation, frequency, gam, amplitude, geodesic, radial, acoustic, structure, observed, correlation    |
| Probe measurement, Scrape-off layer      | probe, sol, layer, scrapeoff, measurement, potential, limiter, measured, blob, langmuir                 |
| Kinetic theory, Drift                    | kinetic, rate, linear, drift, growth, gyrokinetic, instability, gradient, regime, model                 |
| Spectroscopy                             | line, emission, spectrum, intensity, spectral, charge, spectroscopy, measurement, nm, measured          |
| Realtime acquisition, EAST               | system, data, realtime, east, acquisition, developed, software, signal, operation, time                 |
| Application to society (general)         | device, role, physic, interaction, process, play, discussed, particular, understanding, application     |
| Feedback control                         | wall, feedback, coil, system, controller, position, model, vertical, shape, algorithm                   |
| Scaling law                              | parameter, scaling, width, power, value, factor, data, law, model, database                             |
| Vacuum vessel, Dust                      | vacuum, vessel, dust, system, tritium, iter, hydrogen, gas, chamber, safety                             |
| Energetic particle loss                  | particle, loss, fast, energetic, orbit, distribution, fastion, dust, alpha, ripple                      |
| Cooling, Magnet                          | cooling, heat, conductor, magnet, strand, helium, superconducting, test, flow, cable                    |
| Disruption                               | disruption, thermal, force, load, iter, analysis, stress, structure, reactor, method                    |
| Power plant, Blanket                     | reactor, blanket, design, power, system, analysis, tritium, neutron, module, nuclear                    |
| ITER, Design, DEMO                       | iter, design, development, system, reactor, demo, physic, component, project, device                    |
| Operation scenario                       | scenario, operation, power, discharge, drive, performance, iter, profile, limit, regime                 |
| Superconducting coil, KSTAR              | coil, superconducting, tf, kstar, magnet, system, design, toroidal, vacuum, pf                          |
